# Supplementary material for: A Theoretical and Experimental Approach to the Analysis of Hydrogen Generation and Thermodynamic Behavior in an In Situ Heavy Oil Upgrading Process Using Oil-Based Nanofluids
Source: MDPI journal article supplement (doi:10.3390/catal12111349), 2022-11-02
Supplement: s1 [file s1]

Supplementary material

# A Theoretical and Experimental Approach to the Analysis of Hydrogen Generation and Thermodynamic Behavior in an In Situ Heavy Oil Upgrading Process Using Oil-Based Nanofluids

Oscar E. Medina <sup>1,2,\*</sup>, Santiago Céspedes <sup>1</sup>, Richard D. Zabala <sup>2</sup>, Carlos A. Franco <sup>2</sup>, Agustín F. Pérez-Cadenas <sup>3</sup>, Francisco Carrasco-Marín <sup>3</sup>, Sergio H. Lopera <sup>4</sup>, Farid B. Cortés <sup>1,\*</sup> and Camilo A. Franco <sup>1,\*</sup>

<sup>1</sup> Grupo de Investigación en Fenómenos de Superficie—Michael Polanyi, Departamento de Procesos y Energía, Facultad de Minas, Universidad Nacional de Colombia, Sede Medellín, Medellín 050034, Colombia

<sup>2</sup> Vicepresidencia Técnica de Desarrollo (VDE), Ecopetrol S.A., Bogotá 110311, Colombia

<sup>3</sup> Grupo de Investigación en Materiales de Carbón, Departamento de Química Inorgánica, Facultad de Ciencias—Unidad de Excelencia Química Aplicada a Biomedicina y Medioambiente, University of Granada (UEQ-UGR), 18071 Granada, Spain

<sup>4</sup> Grupo de Investigación en Yacimientos de Hidrocarburos, Departamento de Procesos y Energía, Facultad de Minas, Universidad Nacional de Colombia, Sede Medellín, Medellín 050034, Colombia

\* Correspondence: oemedinae@unal.edu.co (O.E.M.); fbcortes@unal.edu.co (F.B.C.); caafranoar@unal.edu.co (C.A.F.)

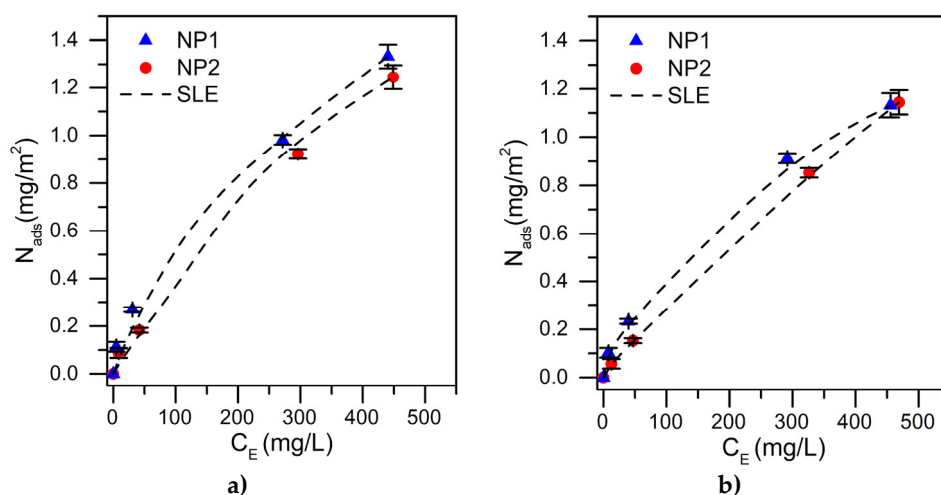

**Figure S1.** Experimental adsorption of *n*-C<sub>7</sub> asphaltene isolated from a) HO1 and b) HO2 over NP1 and NP2 (dotted lines represent the SLE fitting).

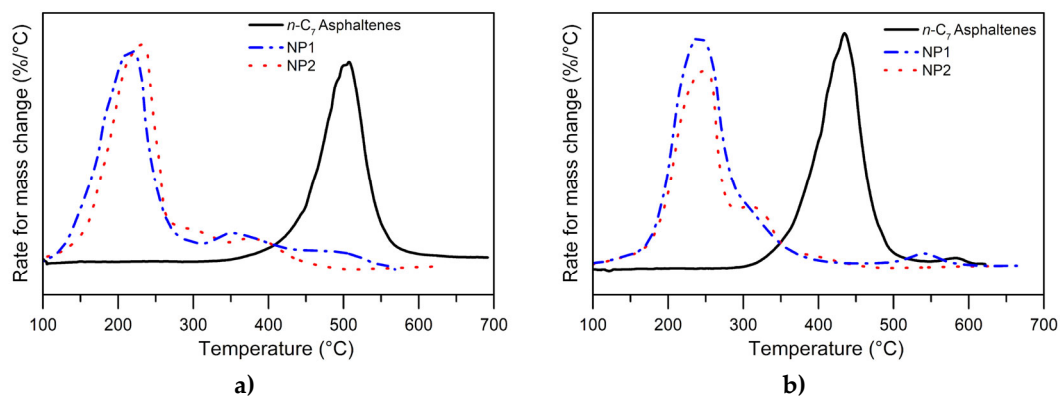

**Figure S2.** Rate for mass change profiles for steam gasification of  $n$ -C<sub>7</sub> asphaltenes isolated from a) HO1 and b) HO2, with and without NP1 and NP2. Heating rate: 10 °C·min<sup>-1</sup>, N<sub>2</sub> flow: 100 ml·min<sup>-1</sup>, H<sub>2</sub>O<sub>(g)</sub> flow: 6.7 ml·min<sup>-1</sup> and sample mass 1 mg.

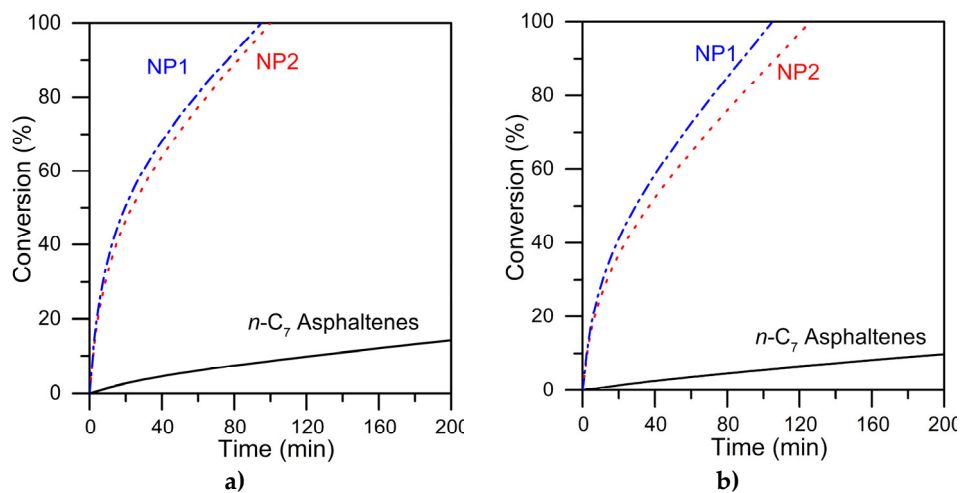

**Figure S3.** Isothermal conversion for steam gasification of  $n$ -C<sub>7</sub> asphaltenes isolated from a) HO1 and b) HO2 with and without NP1 and NP2. Heating rate: 10 °C·min<sup>-1</sup>, N<sub>2</sub> flow: 100 ml·min<sup>-1</sup>, H<sub>2</sub>O<sub>(g)</sub> flow: 6.7 ml·min<sup>-1</sup> and sample mass 1 mg.

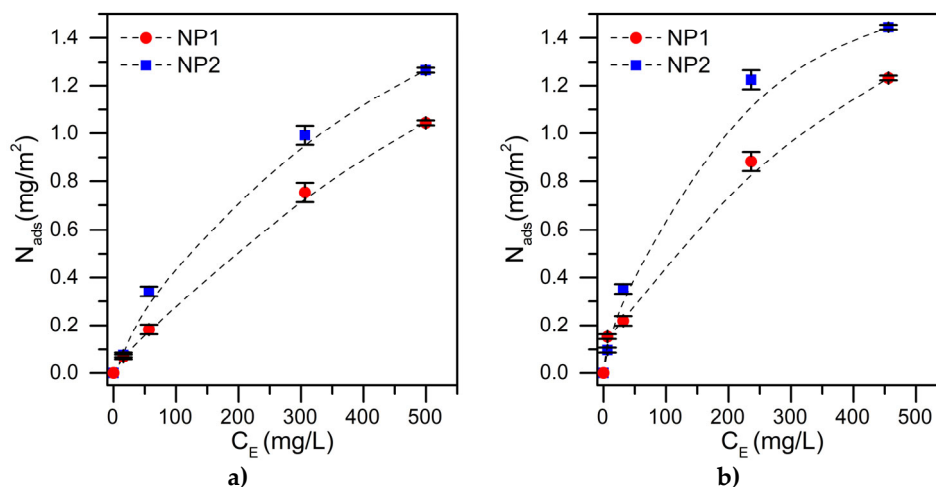

**Figure S4.** Experimental adsorption of resins isolated from a) HO1 and b) HO2 over NP1 and NP2 (dotted lines represent the SLE fitting).

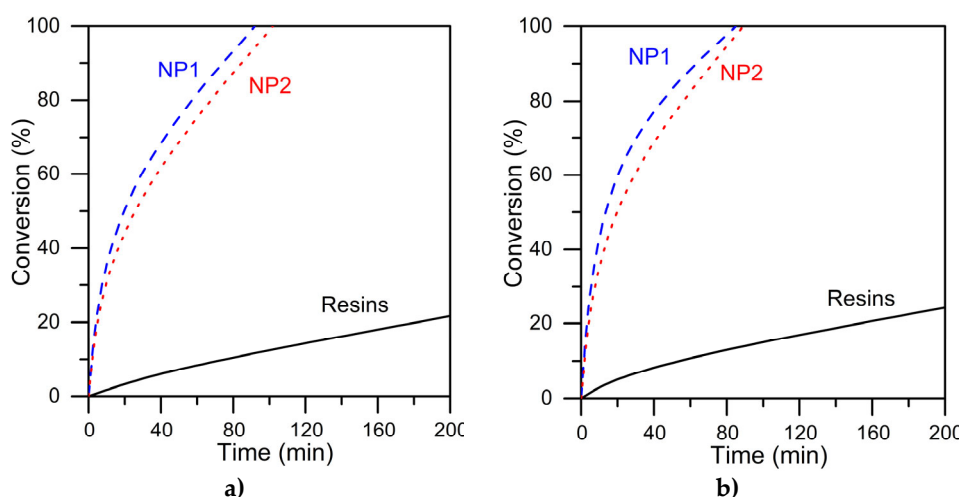

**Figure S5.** Isothermal conversion for steam gasification of resins isolated from a) HO1 and b) HO2 with and without NP1 and NP2. Heating rate: 10 °C·min<sup>-1</sup>, N<sub>2</sub> flow: 100 ml·min<sup>-1</sup>, H<sub>2</sub>O<sub>(g)</sub> flow: 6.7 ml·min<sup>-1</sup> and sample mass 1 mg.

Figure S6 shows the presence of characteristic bands of the hydroxyl functional groups (O-H) associated with the presence of alcohols at 3391 cm<sup>-1</sup> wavelengths [53]. The vibration corresponding to the -CH bonds are also found at 2900 cm<sup>-1</sup>, related to the presence of olefins, and finally, bands with C=C, C=O, C-N, C-C, C-O, and C-O-C bonds are recognized (1500–1700 cm<sup>-1</sup>) [54]. The carrier comprises aliphatic hydrocarbons, with carboxylic acids, ester groups, amines, amides, and nitrogen groups [55].

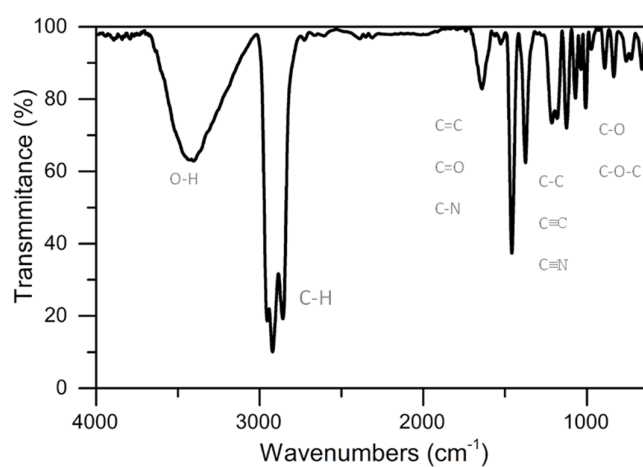

**Figure S6.** IR spectra for carrier used in the nanofluid for steam injection displacement.
